# Supplementary material
Source: publisher site journal article supplement (http://www.spandidos-publications.com/2690/downloadSupplementary)
Supplement: Supplementary file 1 [file downloadSupplementary]

## Sheet: Sheet1
Table S1. The clinical data of patients.
Patient number	OS (1=Dead, 0=Alive)	OS (Months)	DFS (1=Recurrence, 0=No recurrence)	DFS (Months)	circ-TOP2A expression (1=High, 0=Low)
1	1	4.2	1	4.2	1
2	1	4.4	1	4.4	1
3	1	9.6	1	8	1
4	1	9.8	1	8	0
5	1	10	1	8.5	1
6	1	10.2	1	9	1
7	1	11.4	1	9.1	1
8	1	12.4	1	9.1	1
9	1	12.5	1	9.1	1
10	1	13.1	1	9.5	0
11	1	13.3	1	9.5	1
12	1	15.4	1	10	1
13	1	15.4	1	10	1
14	1	17.5	1	12	1
15	1	26.2	1	22	1
16	1	27.3	1	21	0
17	1	27.5	1	20	1
18	1	27.8	1	25	1
19	1	32.8	1	32.8	1
20	1	42	1	42	1
21	1	44	1	22	0
22	0	60	0	60	1
23	0	60	0	60	1
24	1	14.4	1	10	0
25	1	14.8	1	11	1
26	1	14.9	1	11	1
27	1	20.2	1	15	0
28	1	20.7	1	15	0
29	1	20.8	1	15	0
30	1	21	1	16	1
31	0	21.1	0	16	0
32	0	22.5	0	16	0
33	1	27.6	1	20	0
34	1	27.9	1	20	1
35	1	28.4	1	22	0
36	1	30.2	1	22	0
37	1	30.9	1	25	1
38	1	36.5	1	26	0
39	0	60	0	60	1
40	0	60	0	60	0
41	0	60	0	60	0
42	0	60	0	60	1
43	0	60	0	60	1
44	0	60	0	60	0
45	1	50.45	1	33	0
46	1	52	1	35	0
47	1	55	1	40	1
48	0	60	0	56	0
49	0	60	0	55	1
50	0	60	0	50	0
51	0	60	0	58	0
52	0	60	0	60	1
53	0	60	0	60	0
54	0	60	0	60	1
55	1	56.4	1	50	0
56	1	58.5	1	38	1
57	1	59.2	1	44	0
58	0	60	0	60	0
59	0	60	0	60	1
60	0	60	0	60	1
61	0	60	0	60	0
62	0	60	0	60	0
63	0	60	0	60	1
64	0	60	0	60	1
65	0	60	0	60	1
66	0	60	0	60	0
67	0	60	0	60	0
68	0	60	0	60	0
69	0	60	0	60	0
70	0	60	0	60	0
71	0	60	0	60	0
72	0	60	0	60	0
73	0	60	0	60	0
74	0	60	0	60	0
